# Supplementary material for: Cytochrome P450 Monooxygenase-Mediated Metabolic Utilization of Benzo[a]Pyrene by Aspergillus Species
Source: PubMed Central journal article supplement (PMC6538779; doi:10.1128/mbio.00558-19), 2019-05-28

**A**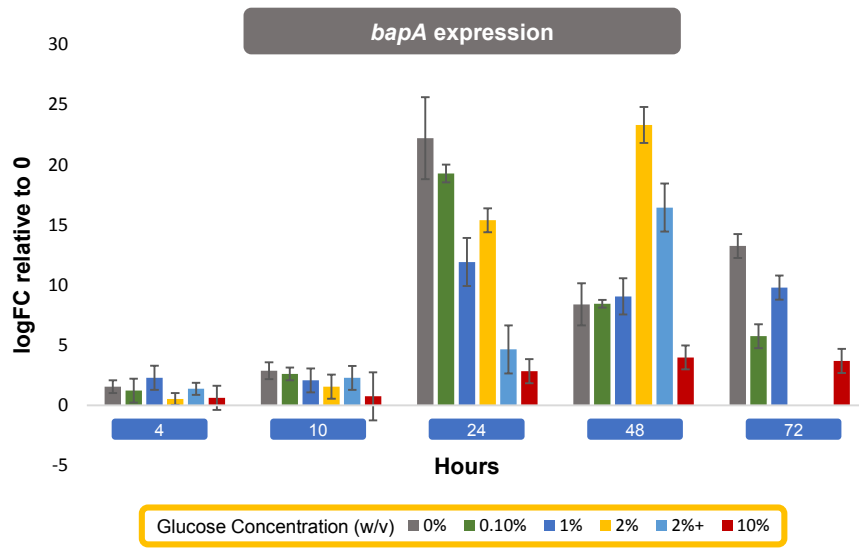**B**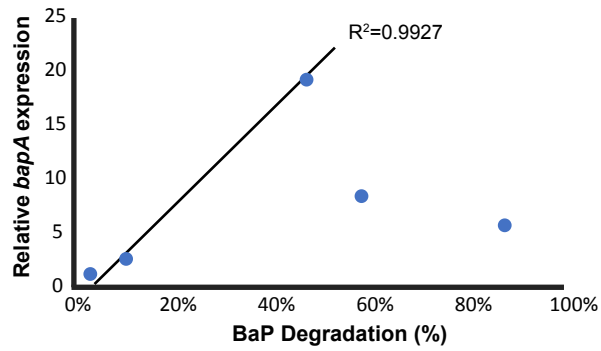

Supplement: mBio.00558-19-sf002.pdf [file mBio.00558-19-sf002.pdf]
